# Supplementary material for: Radiochemical and Biological Evaluation of 3p-C-NETA-ePSMA-16, a Promising PSMA-Targeting Agent for Radiotheranostics
Source: MDPI journal article supplement (doi:10.3390/ph16060882), 2023-06-15
Supplement: s1 [file s1]

## Supplementary Information

# Radiochemical and Biological Evaluation of 3p-C-NETA-ePSMA-16, a Promising PSMA-Targeting Agent for Radiotheranostics

Erika Murce <sup>1,2</sup>, Stephen Ahenkorah <sup>3,4</sup>, Savanne Beekman <sup>1,2</sup>, Maryana Handula <sup>1,2</sup>, Debra Stuurman <sup>1,2</sup>,  
Corrina de Ridder <sup>1,2</sup>, Frederik Cleeren <sup>4</sup> and Yann Seimbille <sup>1,2,5,\*</sup>

- <sup>1</sup> Department of Radiology and Nuclear Medicine, University Medical Center, Rotterdam, Erasmus MC, 3015 GD Rotterdam, The Netherlands; e.murcesilva@erasmusmc.nl (E.M.); s.beekman@erasmusmc.nl (S.B.); m.handula@erasmusmc.nl (M.H.); d.stuurman@erasmusmc.nl (D.S.); c.deridder@erasmusmc.nl (C.d.R.)  
<sup>2</sup> Erasmus MC Cancer Institute, 3015 GD Rotterdam, The Netherlands  
<sup>3</sup> NURA research group, Belgian Nuclear Research Center (SCK CEN), 2400 Mol, Belgium; stephen.ahenkorah@kuleuven.be  
<sup>4</sup> Radiopharmaceutical Research, Department of Pharmacy and Pharmacology, University of Leuven, 3000 Leuven, Belgium; frederik.cleeren@kuleuven.be  
<sup>5</sup> TRIUMF, Life Sciences Division, Vancouver, BC V6T 2A3, Canada  
\* Correspondence: y.seimbille@erasmusmc.nl; Tel.: +31-10-703-8961

## Table of Contents

|                                                                                 |    |
|---------------------------------------------------------------------------------|----|
| <i>CHARACTERIZATION OF 1-4</i> .....                                            | 2  |
| <i>STABILITY OF [<sup>111</sup>IN]IN-3P-C-NETA-EPSMA-16</i> .....               | 4  |
| <i>STABILITY OF [<sup>177</sup>LU]LU-3P-C-NETA-EPSMA-16</i> .....               | 8  |
| <i>STABILITY OF [<sup>18</sup>F]ALF-3P-C-NETA-EPSMA-16</i> .....                | 11 |
| <i>EX VIVO BIODISTRIBUTION OF [<sup>111</sup>IN]IN-3P-C-NETA-EPSMA-16</i> ..... | 12 |
| <i>IN VIVO BIODISTRIBUTION OF [<sup>18</sup>F]ALF-3P-C-NETA-EPSMA-16</i> .....  | 13 |

### Characterization of 1-4

Compounds **1-4** were characterized for their chemical purity by LC-MS at 220 or 254 nm and for their identity by ESI-MS.

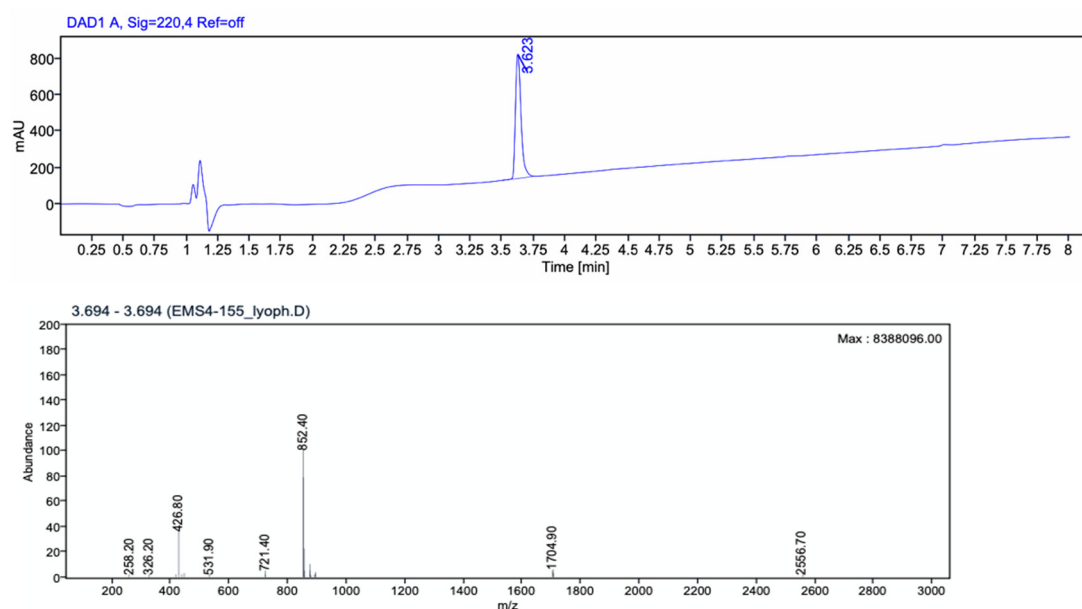

**Figure S1.1:** LC chromatogram and mass spectrum of **1**. ESI-MS m/z: calc'd for  $C_{39}H_{61}N_7O_{14}$  851.43; found 852.40  $[M+H]^+$ .

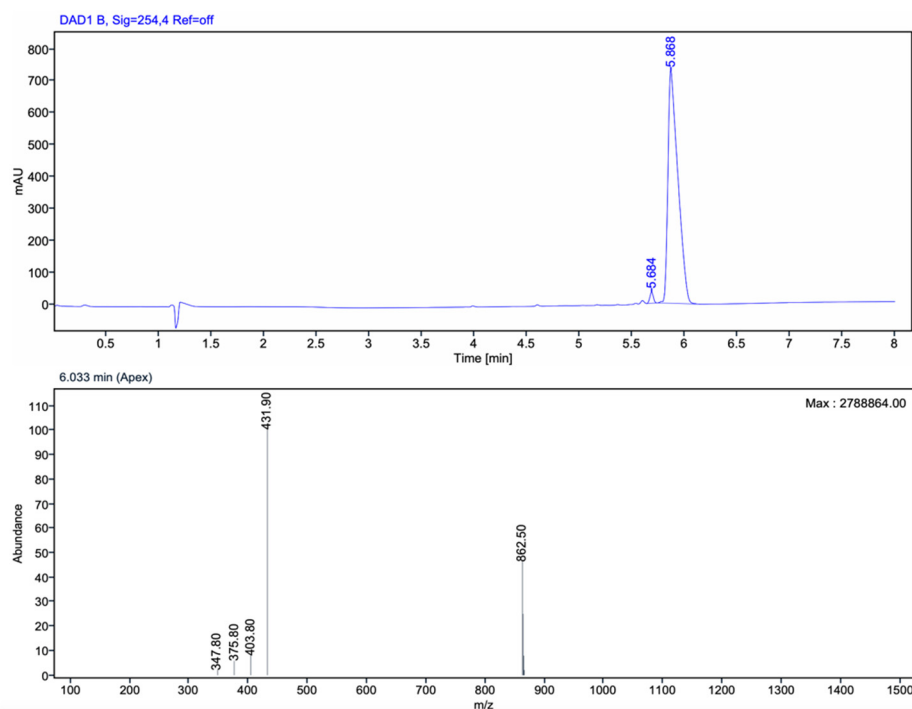

**Figure S1.2:** LC chromatogram and mass spectrum of **2**. ESI-MS m/z: calc'd for  $C_{45}H_{75}N_6O_{11}$  861.55; found 862.50  $[M+H]^+$ .

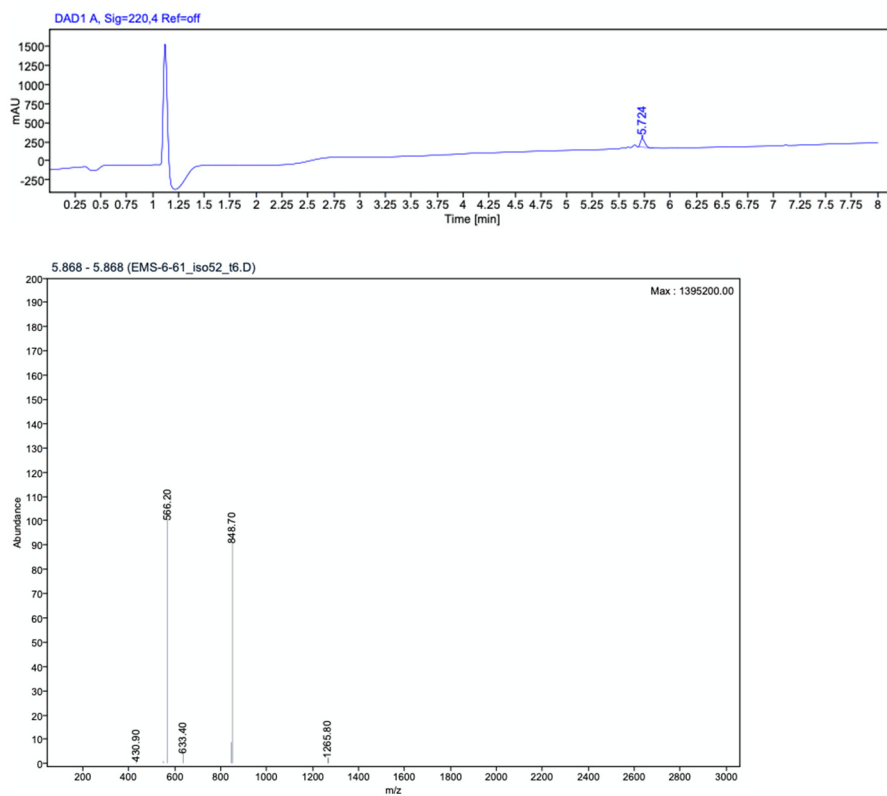

**Figure S1.3:** LC chromatogram and mass spectrum of **3**. ESI-MS m/z: calc'd for  $C_{84}H_{134}N_{12}O_{24}$  1694.96; found 848.70  $[M+2H]^{2+}$ ; 566.20  $[M+3H]^{3+}$ .

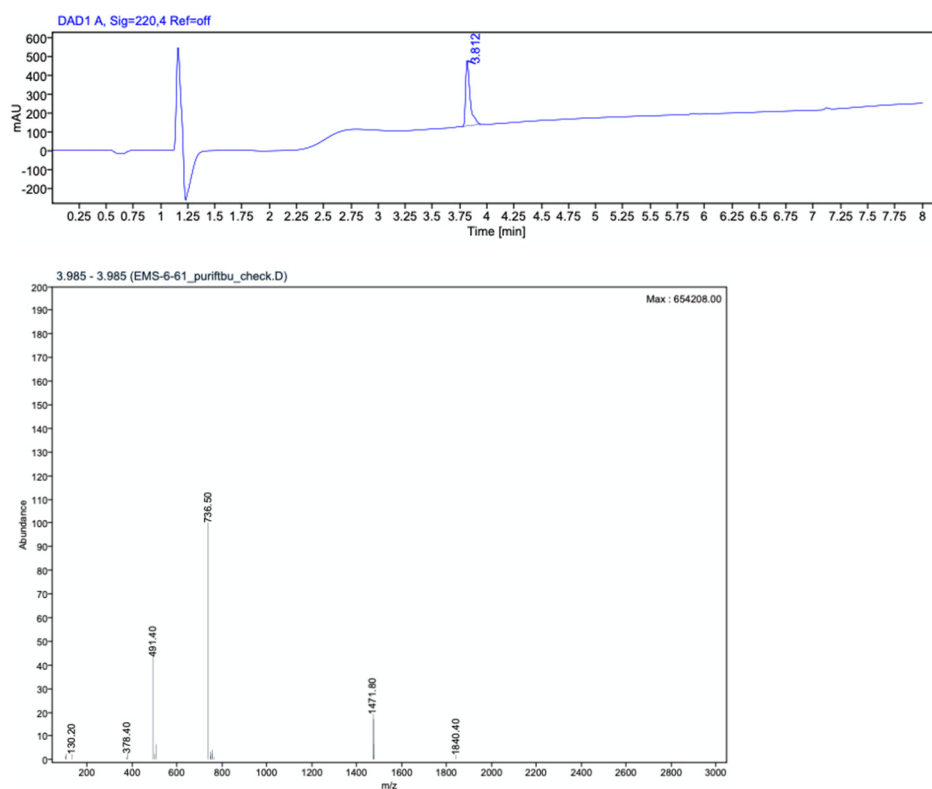

**Figure S1.4:** LC chromatogram and mass spectrum of **3p-C-NETA-ePSMA-16**. ESI-MS m/z: calc'd for  $C_{68}H_{102}N_{12}O_{24}$  1470.71; found 1471.80  $[M+H]^+$ ; 736.50  $[M+2H]^{2+}$ .

*Stability of [<sup>111</sup>In]In-3p-C-NETA-ePSMA-16*

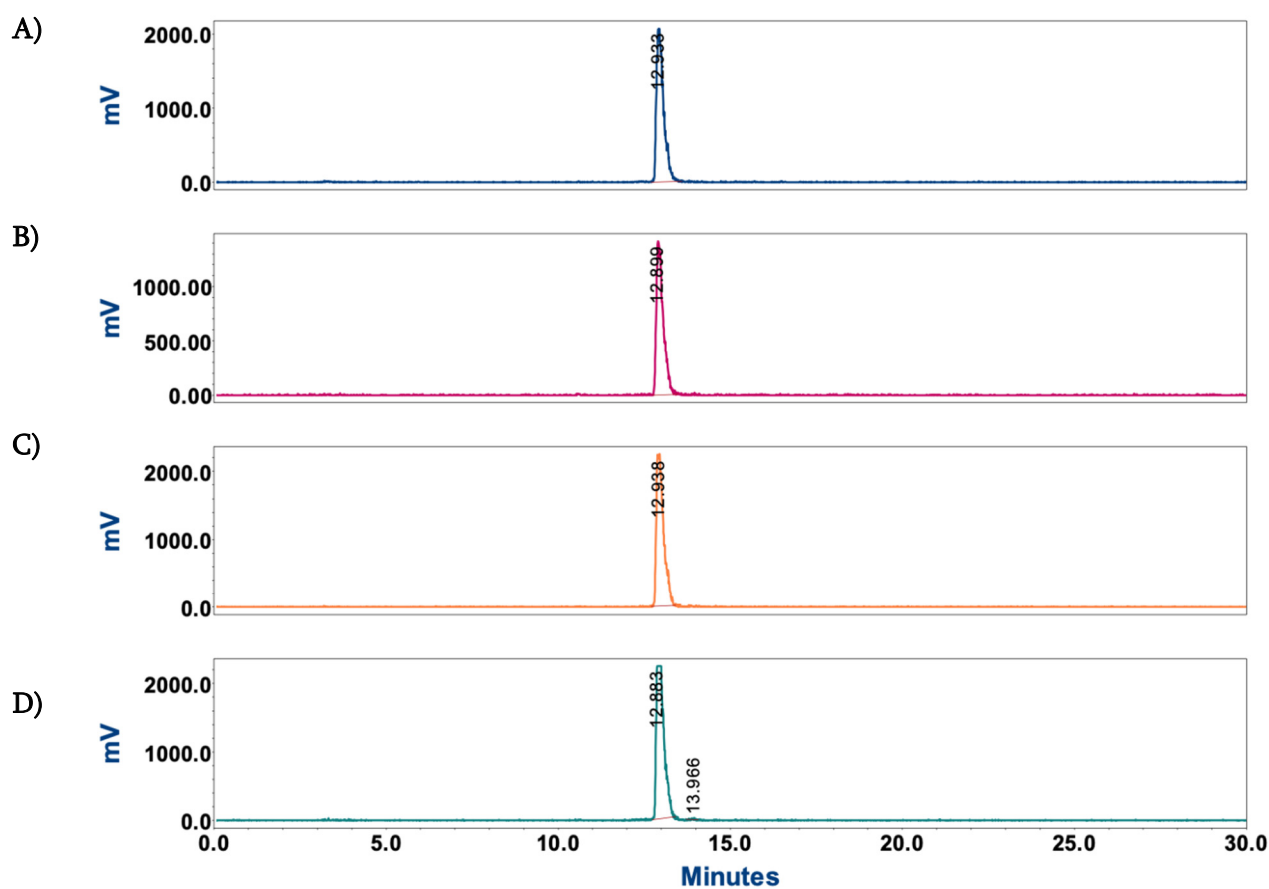

**Figure S2.** Stability of [<sup>111</sup>In]In-3p-C-NETA-ePSMA-16 in PBS at 37 °C for up to 24 h. (A) radio-HPLC injection of the labeling solution. (B), (C) and (D) radio-HPLC injection of solution after 1, 4 and 24 h incubation in PBS, respectively.

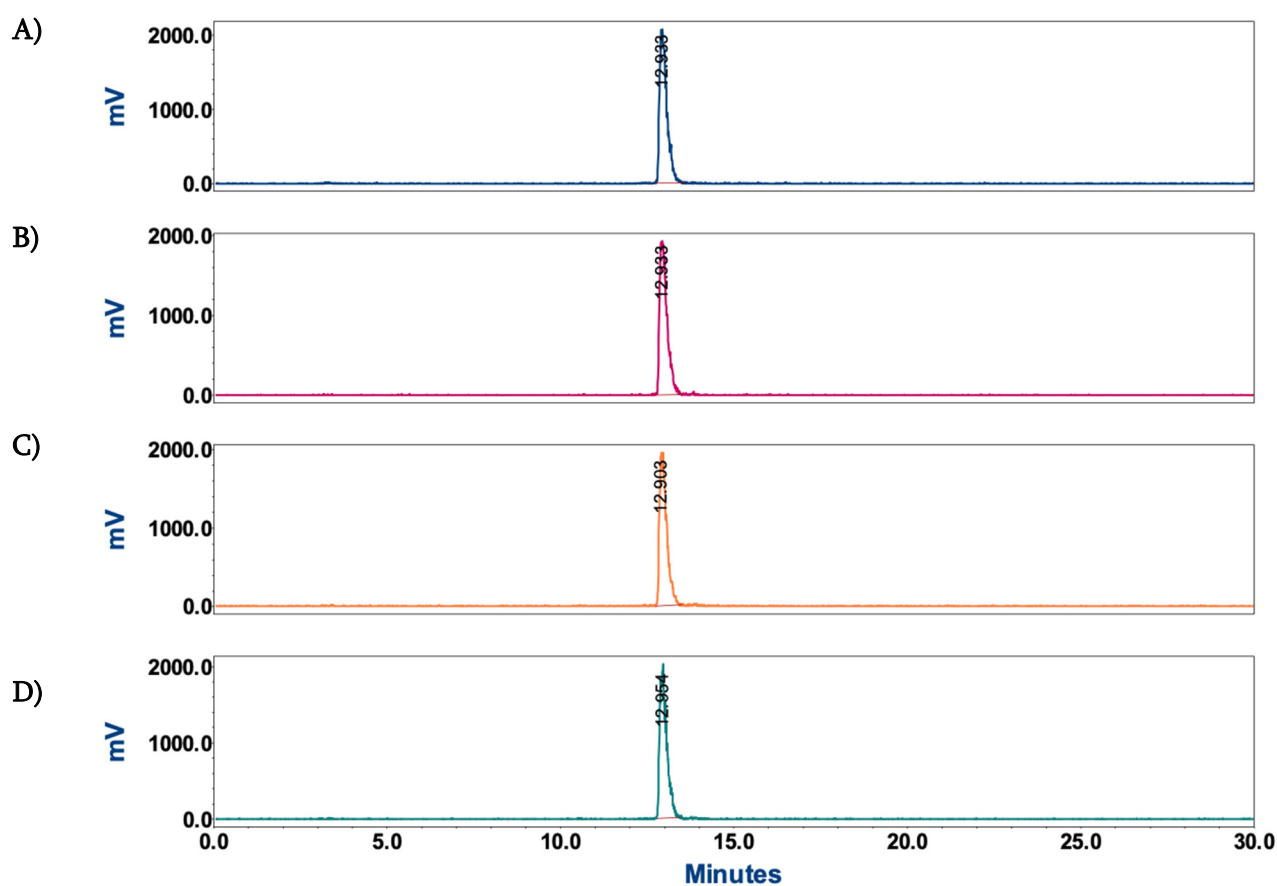

**Figure S3.** Stability of [ $^{111}\text{In}$ ]In-3p-C-NETA-ePSMA-16 in mouse serum at 37 °C for up to 24 h. (A) radio-HPLC injection of the labeling solution. (B), (C) and (D) radio-HPLC injection of solution after 1, 4 and 24 h incubation in mouse serum, respectively.

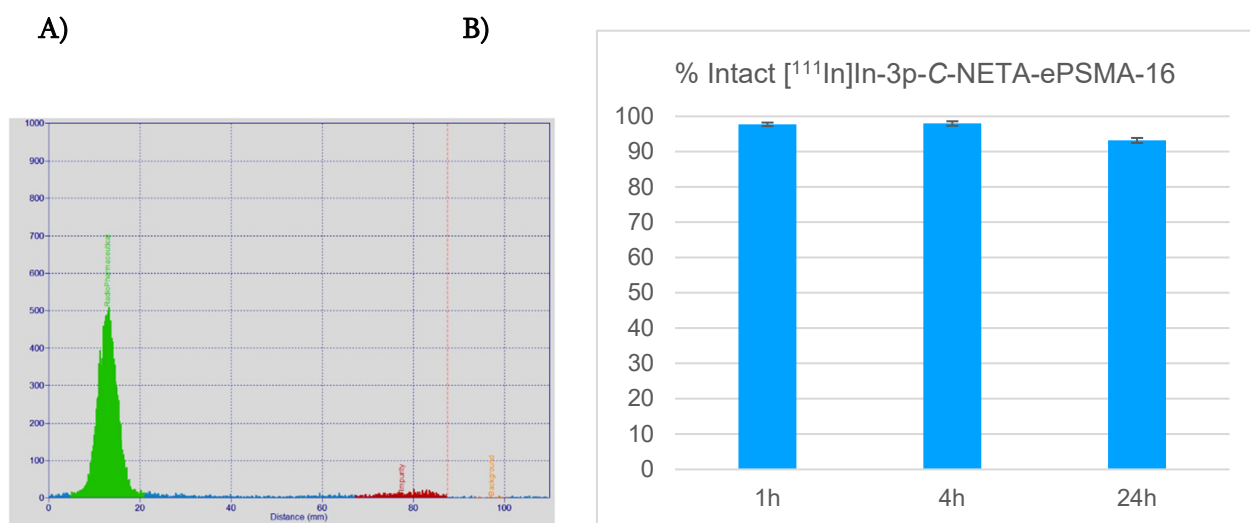

**Figure S4.** Transchelation of [ $^{111}\text{In}$ ]In-3p-*C*-NETA-ePSMA-16 with 1000-fold excess EDTA. **(A)** iTLC of [ $^{111}\text{In}$ ]In-3p-*C*-NETA-ePSMA-16 after 24 h incubation with excess EDTA at 37 °C. **(B)** Plotted values of the RCY of [ $^{111}\text{In}$ ]In-3p-*C*-NETA-ePSMA-16 after incubation with excess EDTA at 1, 4 and 24 h ( $n = 3$  for each timepoint).

A)

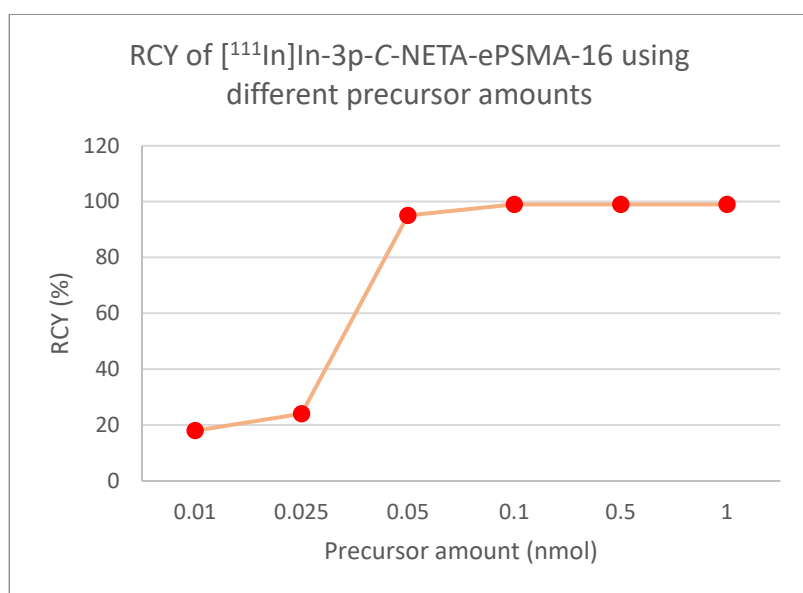

B)

| Amount of precursor (nmol) | RCY (%) |
|----------------------------|---------|
| 1.000                      | 99.9    |
| 0.500                      | 99.5    |
| 0.100                      | 99.4    |
| 0.050                      | 95.4    |
| 0.025                      | 24.4    |
| 0.010                      | 18.1    |

**Figure S5.** Radiochemical yield (RCY) of the labeling of [ $^{111}\text{In}$ ]In-3p-C-NETA-ePSMA-16 with different precursor amounts (nmol). A standard SA of 10 MBq was used for all labelings. **(A)** Plotted values of the RCY of [ $^{111}\text{In}$ ]In-3p-C-NETA-ePSMA-16 when labeled with different precursor amounts. **(B)** Numerical values of the RCY at the different precursor amounts.

*Stability of [<sup>177</sup>Lu]Lu-3p-C-NETA-ePSMA-16*

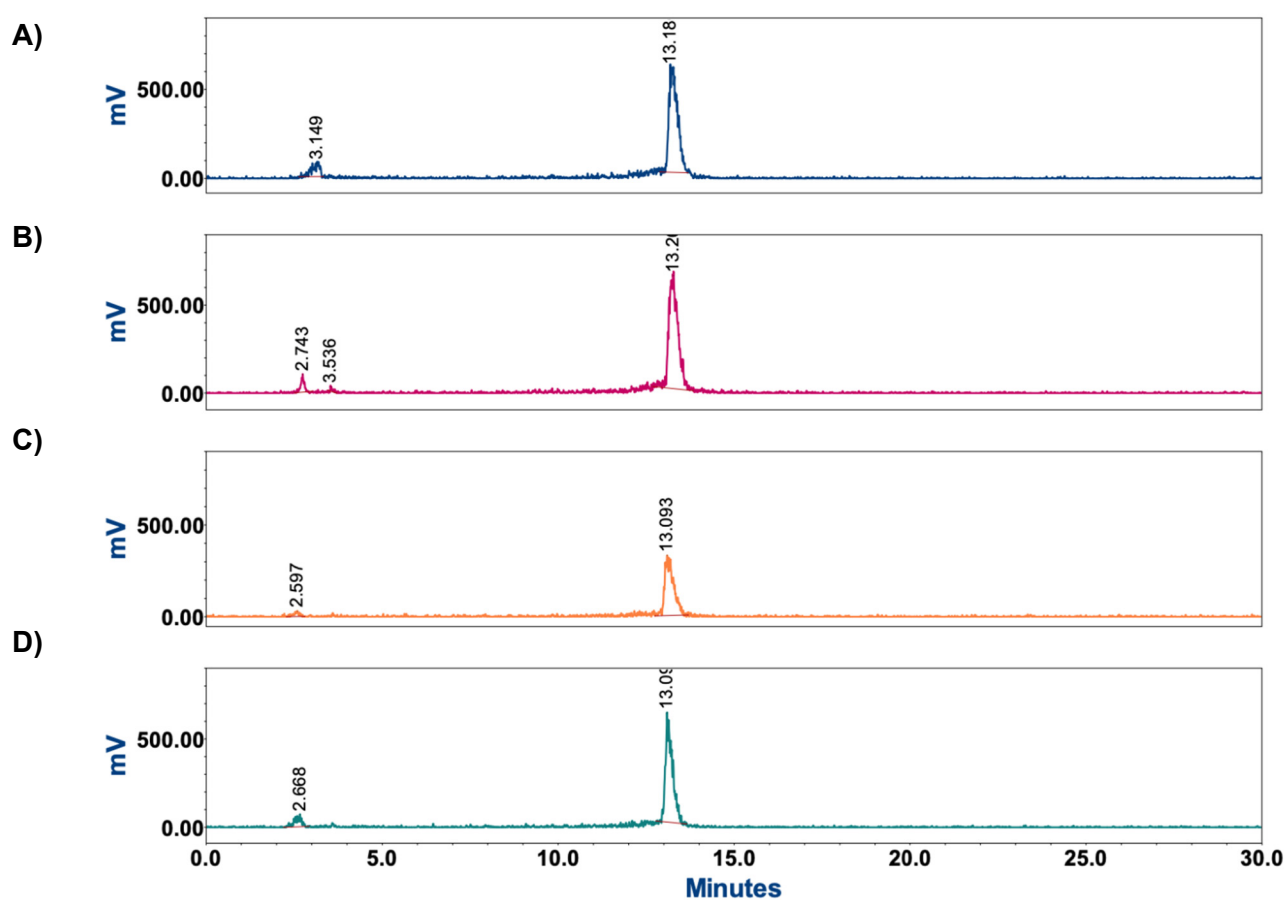

**Figure S6.** Stability of [<sup>177</sup>Lu]Lu-3p-C-NETA-ePSMA-16 in PBS at 37 °C for up to 24 h. (A) radio-HPLC injection of the labeling solution. (B), (C) and (D) radio-HPLC injection of solution after 1, 4 and 24 h incubation in PBS, respectively.



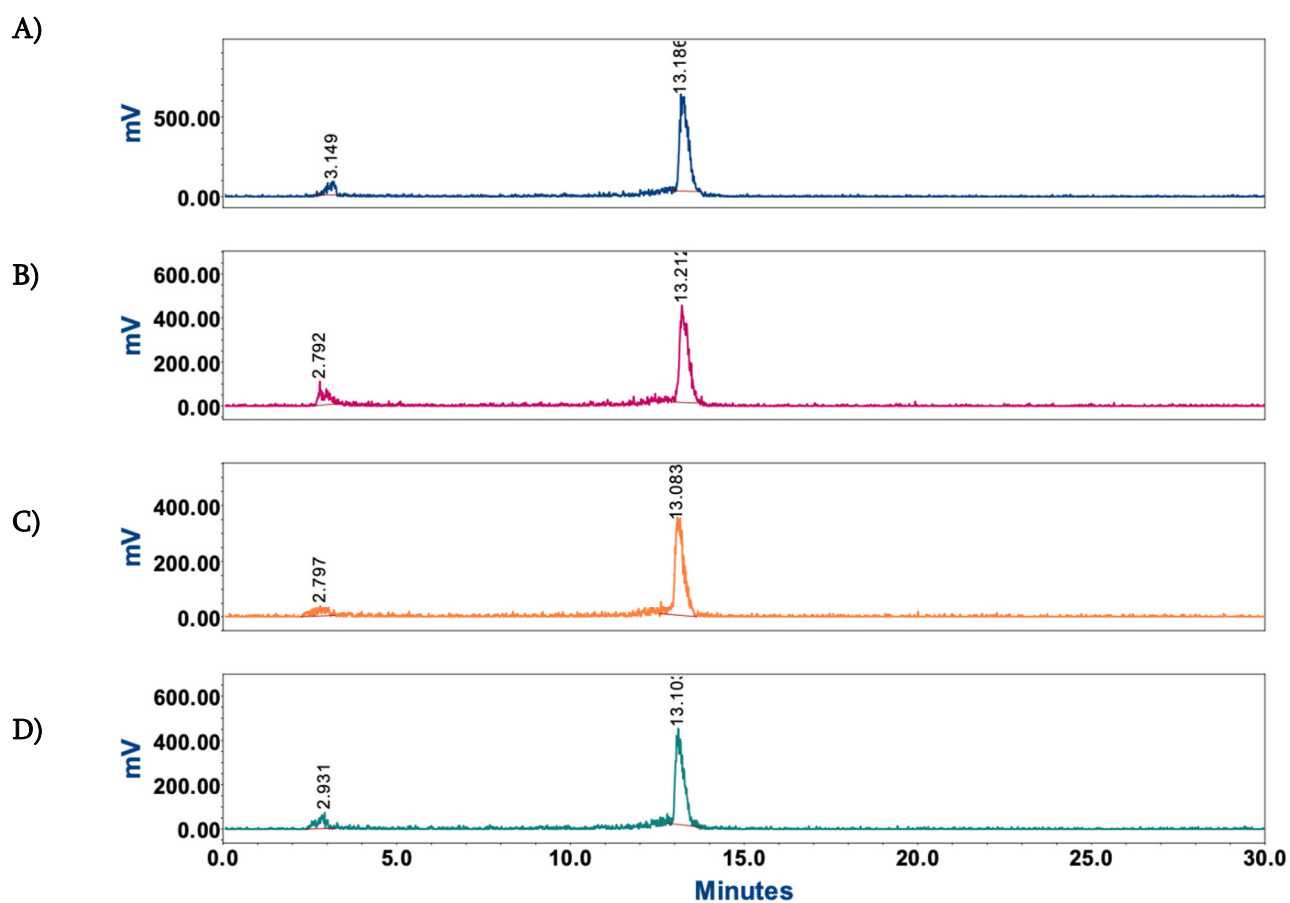

**Figure S7.** Stability of [ $^{177}\text{Lu}$ ]Lu-3p-C-NETA-ePSMA-16 in mouse serum at 37 °C for up to 24 h. (A) radio-HPLC injection of the labeling solution. (B), (C) and (D) radio-HPLC injection of solution after 1, 4 and 24 h incubation in mouse serum, respectively.

### Stability of [ $^{213}\text{Bi}$ ]Bi-3p-C-NETA-ePSMA-16

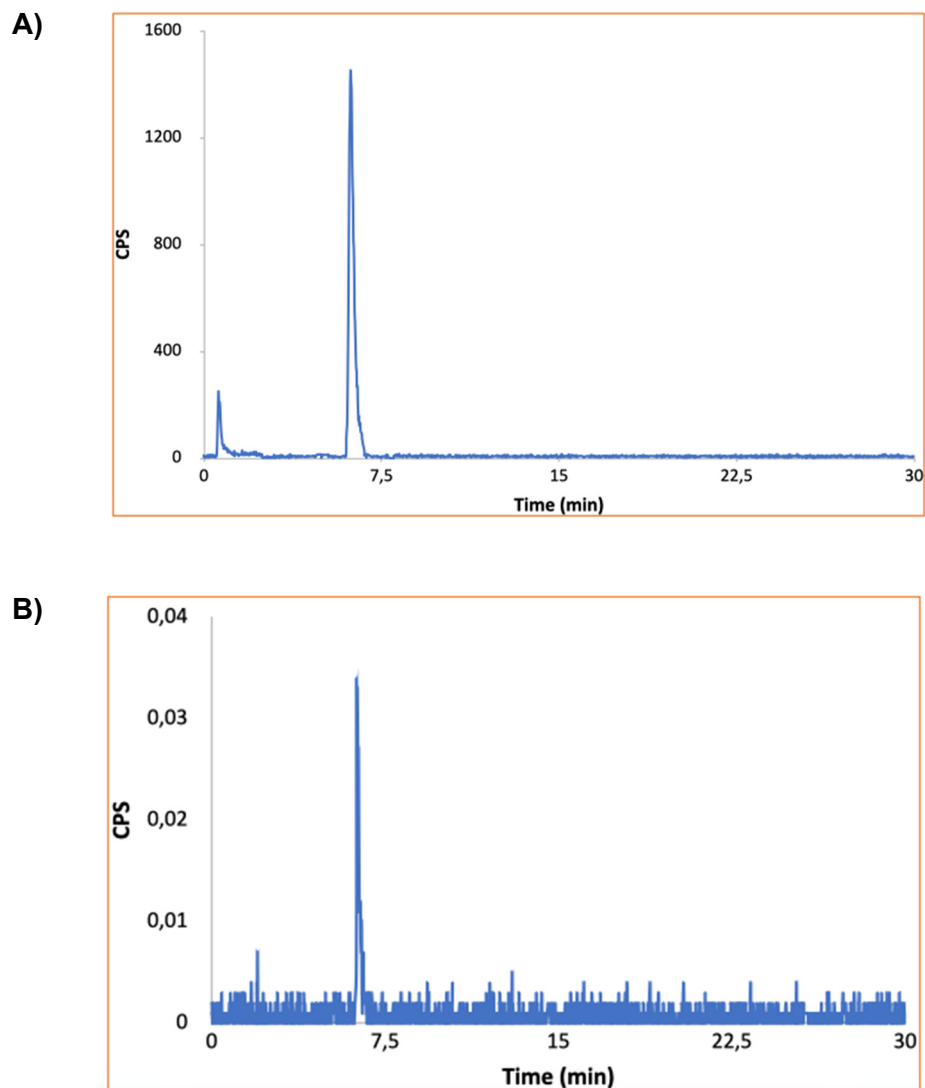

**Figure S8.** Stability of [ $^{213}\text{Bi}$ ]Bi-3p-C-NETA-ePSMA-16 in human serum for up to 4 h. **(A)** radio-HPLC injection of the labeling solution. **(B)** radio-HPLC injection of solution after 4 h incubation in human serum.

*Stability of [ $^{18}\text{F}$ ]AlF-3p-C-NETA-ePSMA-16*

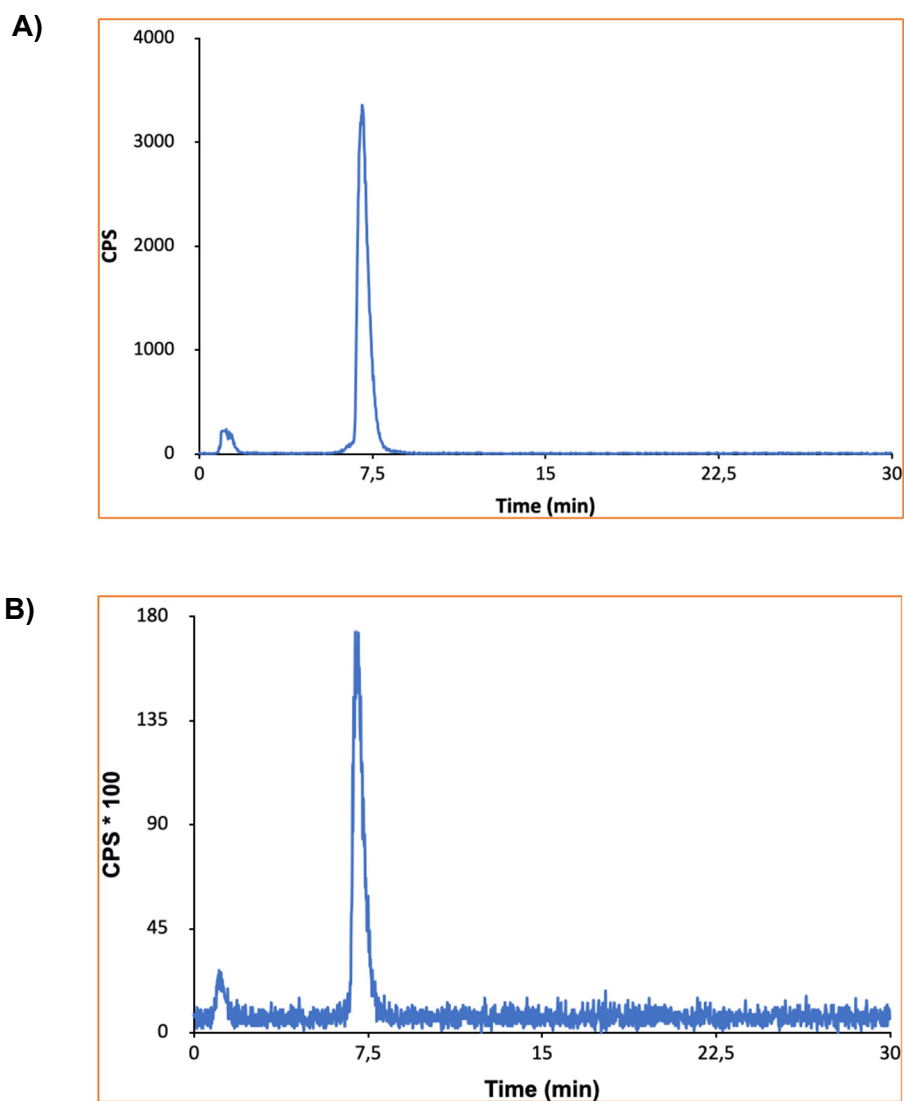

**Figure S9.** Stability of [ $^{18}\text{F}$ ]AlF-3p-C-NETA-ePSMA-16 in human serum for up to 4 h. **(A)** radio-HPLC injection of the labeling solution. **(B)** radio-HPLC injection of solution after 4 h incubation in human serum.

***Ex vivo biodistribution of [<sup>111</sup>In]In-3p-C-NETA-ePSMA-16***

**Table S1:** *Ex vivo* biodistribution data of [<sup>111</sup>In]In-3p-C-NETA-ePSMA-16 (20 MBq/1 nmol) at 1, 4 and 24 h post- injection (n = 4 mice/group). A block group was also performed at 4 h. Data is represented as percentage of injected dose per gram of tissue (% ID/g).

| Organ      | 1h           | 4h           | 4h block    | 24h         |
|------------|--------------|--------------|-------------|-------------|
| Blood      | 0.26 ± 0.19  | 0.01 ± 0.01  | 0.01 ± 0.00 | 0.00 ± 0.00 |
| Tumor      | 1.62 ± 0.55  | 0.89 ± 0.58  | 0.12 ± 0.04 | 0.12 ± 0.02 |
| Heart      | 0.15 ± 0.05  | 0.02 ± 0.00  | 0.02 ± 0.00 | 0.01 ± 0.00 |
| Lung       | 0.45 ± 0.10  | 0.06 ± 0.01  | 0.05 ± 0.01 | 0.02 ± 0.00 |
| Liver      | 0.20 ± 0.03  | 0.07 ± 0.01  | 0.07 ± 0.01 | 0.03 ± 0.00 |
| Spleen     | 1.28 ± 0.49  | 0.12 ± 0.01  | 0.05 ± 0.01 | 0.03 ± 0.00 |
| Stomach    | 0.31 ± 0.21  | 0.05 ± 0.02  | 0.15 ± 0.10 | 0.01 ± 0.00 |
| Intestines | 0.59 ± 0.13  | 0.60 ± 0.28  | 0.68 ± 0.02 | 0.04 ± 0.02 |
| Pancreas   | 0.23 ± 0.05  | 0.03 ± 0.00  | 0.02 ± 0.01 | 0.01 ± 0.00 |
| Kidney     | 26.70 ± 2.12 | 11.62 ± 0.62 | 9.53 ± 1.66 | 4.27 ± 0.87 |
| Muscle     | 0.13 ± 0.09  | 0.04 ± 0.00  | 0.02 ± 0.01 | 0.01 ± 0.00 |
| Skin       | 0.46 ± 0.15  | 0.24 ± 0.15  | 0.13 ± 0.02 | 0.10 ± 0.06 |
| Bone       | 0.20 ± 0.05  | 0.03 ± 0.00  | 0.03 ± 0.01 | 0.02 ± 0.00 |
| Prostate   | 1.08 ± 0.41  | 0.12 ± 0.07  | 0.07 ± 0.02 | 0.04 ± 0.01 |

***In vivo biodistribution of [<sup>18</sup>F]AIF-3p-C-NETA-ePSMA-16***

**Table S2:** *In vivo* biodistribution data of [<sup>18</sup>F]AIF-3p-C-NETA-ePSMA-16 (1.5-3.0 MBq/mouse) up to 85 minutes post injection (n = 4 mice/group). The uptake was quantified in the tumor (PC3-Pip and PC3-Flu), kidneys and liver. Data is represented as SUV<sub>max</sub>.

| Time (min) | Tumor (PC3-Pip) | Tumor (PC3-Flu) | Kidney       | Liver       |
|------------|-----------------|-----------------|--------------|-------------|
| 0.125      | 0               | 0               | 0            | 0           |
| 0.375      | 0.31 ± 0.01     | 0.59 ± 0.15     | 0.01 ± 0.06  | 0.31 ± 0.01 |
| 0.625      | 0.35 ± 0.05     | 1.32 ± 0.16     | 0.14 ± 0.04  | 1.58 ± 0.04 |
| 0.875      | 0.50 ± 0.04     | 1.61 ± 0.21     | 0.50 ± 0.01  | 1.71 ± 0.03 |
| 1.5        | 0.58 ± 0.09     | 1.62 ± 0.11     | 1.86 ± 0.06  | 2.02 ± 0.07 |
| 2.5        | 0.58 ± 0.05     | 1.11 ± 0.09     | 4.10 ± 0.08  | 1.36 ± 0.04 |
| 3.5        | 0.59 ± 0.13     | 0.88 ± 0.09     | 6.34 ± 0.02  | 1.16 ± 0.21 |
| 4.5        | 0.65 ± 0.06     | 0.83 ± 0.05     | 7.36 ± 0.02  | 0.98 ± 0.07 |
| 6.5        | 0.66 ± 0.06     | 0.49 ± 0.09     | 7.81 ± 0.01  | 0.59 ± 0.04 |
| 9.5        | 0.76 ± 0.10     | 0.43 ± 0.07     | 7.66 ± 0.02  | 0.45 ± 0.21 |
| 12.5       | 0.77 ± 0.05     | 0.33 ± 0.04     | 8.22 ± 0.02  | 0.32 ± 0.07 |
| 15.5       | 0.79 ± 0.05     | 0.29 ± 0.04     | 8.55 ± 0.05  | 0.31 ± 0.05 |
| 18.5       | 0.84 ± 0.05     | 0.30 ± 0.04     | 9.51 ± 0.02  | 0.3 ± 0.05  |
| 22.5       | 0.86 ± 0.07     | 0.19 ± 0.04     | 9.52 ± 0.05  | 0.19 ± 0.10 |
| 27.5       | 0.86 ± 0.06     | 0.17 ± 0.04     | 9.61 ± 0.08  | 0.18 ± 0.08 |
| 32.5       | 0.87 ± 0.04     | 0.17 ± 0.04     | 9.61 ± 0.04  | 0.18 ± 0.06 |
| 37.5       | 0.87 ± 0.05     | 0.14 ± 0.04     | 10.21 ± 0.08 | 0.17 ± 0.06 |
| 42.5       | 0.87 ± 0.07     | 0.12 ± 0.04     | 10.42 ± 0.04 | 0.17 ± 0.10 |
| 47.5       | 0.88 ± 0.07     | 0.13 ± 0.05     | 10.42 ± 0.04 | 0.17 ± 0.06 |
| 52.5       | 0.89 ± 0.06     | 0.13 ± 0.05     | 10.53 ± 0.05 | 0.16 ± 0.08 |
| 57.5       | 0.90 ± 0.07     | 0.12 ± 0.05     | 10.53 ± 0.05 | 0.16 ± 0.06 |
| 65         | 0.93 ± 0.04     | 0.11 ± 0.04     | 10.63 ± 0.06 | 0.16 ± 0.06 |
| 75         | 0.94 ± 0.05     | 0.11 ± 0.05     | 10.65 ± 0.08 | 0.16 ± 0.04 |
| 85         | 0.95 ± 0.05     | 0.09 ± 0.04     | 10.65 ± 0.04 | 0.16 ± 0.06 |
